# Supplementary material
Source: Springer Nature journal article supplement (https://www.springermedizin.de/resource/supplementary/12894_2006_92_MOESM3_ESM.pdf/9513940)
Supplement: MOESM3 [file 9513940]

| Probeset     | 5D3_raw | 5D3_std | Endo_raw | Endo_std | SP_raw | SP_std | Common   | Genbank   |
|--------------|---------|---------|----------|----------|--------|--------|----------|-----------|
| 1559263_s_at | 30      | 21      | 28       | 13       | 383    | 118    | FLJ46041 | BG397809  |
| 229327_s_at  | 29      | 13      | 26       | 22       | 247    | 80     | MAF      | BE674528  |
| 207651_at    | 21      | 11      | 33       | 15       | 192    | 61     | H963     | NM_013308 |
| 1558740_s_at | 38      | 20      | 34       | 17       | 134    | 7      | DUSP16   | R30807    |
| 217052_x_at  | 46      | 26      | 47       | 16       | 131    | 24     | TIA1     | AK024108  |
| 206404_at    | 28      | 16      | 43       | 15       | 114    | 26     | FGF9     | NM_002010 |
| 1559584_a_at | 15      | 6       | 17       | 19       | 109    | 62     | FLJ35681 | BC025741  |
| 210279_at    | 18      | 11      | 44       | 42       | 98     | 17     | GPR18    | AF261135  |
| 219528_s_at  | 26      | 13      | 40       | 31       | 84     | 5      | BCL11B   | NM_022898 |
| 206761_at    | 25      | 12      | 26       | 8        | 82     | 31     | CD96     | NM_005816 |
| 236539_at    | 14      | 6       | 20       | 10       | 78     | 19     | PTPN22   | AW665758  |
| 206545_at    | 24      | 14      | 31       | 26       | 77     | 25     | CD28     | NM_006139 |
| 1565823_at   | 43      | 36      | 18       | 14       | 63     | 16     | CDC10    | BF855173  |
| 206365_at    | 12      | 6       | 13       | 4        | 61     | 5      | XCL1     | NM_002995 |
| 1555963_x_at | 30      | 19      | 46       | 12       | 59     | 16     | B3GNT7   | CA503291  |
| 1556586_x_at | 35      | 14      | 36       | 19       | 53     | 8      | SDS3     | BC041995  |
| 239157_at    | 23      | 17      | 42       | 11       | 52     | 16     |          | AL521521  |
